# Supplementary material for: A novel capillary microplasma analytical system: interface-free coupling of glow discharge optical emission spectrometry to capillary electrophoresis
Source: Royal Society of Chemistry journal article supplement (doi:10.1039/c6ja00142d), 2016-01-01
Supplement: c6ja00142d1.pdf [file c6ja00142d1.pdf]

## Supporting Information

### **A Novel Capillary Microplasma Analytical System: Interface-free Coupling of Glow Discharge Optical Emission Spectrometry to Capillary Electrophoresis**

*Xue Jiang<sup>a</sup>, Xinliang Xu<sup>b</sup>, Xiandeng Hou<sup>a,c\*</sup>, Zhou Long<sup>c</sup>, Yunfei Tian<sup>c</sup>, Xiaoming Jiang<sup>c</sup>, Fujian Xu<sup>c</sup>, and  
Chengbin Zheng<sup>a\*</sup>*

<sup>a</sup> Key Laboratory of Green Chemistry & Technology, Ministry of Education, College of Chemistry, Sichuan University, Chengdu, Sichuan 610064, China

<sup>b</sup> York Plasma Institute, University of York, York, NorthYorkshire, YO10 5DD, UK

<sup>c</sup> Analytical & Testing Center, Sichuan University, Chengdu, Sichuan 610064, China. & Testing Center, Sichuan University, Chengdu, Sichuan 610064, China

\*Corresponding authors:

E-mails: houxd@scu.edu.cn (Hou XD) and abinscu@scu.edu.cn (Zheng CB)

## Table of Content

1. Reverse C- $\mu$ PAS.
2. Operation conditions of HPLC-ICP-MS.
3. Relationship between current and voltage of C- $\mu$ PAS and reverse C- $\mu$ PAS.
4. Optimization of voltage of C- $\mu$ PAS for separation.
5. Optimization of injection time of C- $\mu$ PAS for separation.
6. Investigation of optical emission spectra of C- $\mu$ PAS.
7. Calculation of electron temperature and electron density of microplasma.
8. Investigation of background emission of discharge gas in C- $\mu$ PAS.
9. Effect of Ar flow rate on mercury atomic emission.
10. Influence of analyte concentration.
11. Comparison of LODs by this method with those reported in references.
12. Photo of C- $\mu$ PAS.

## 1. Reverse C- $\mu$ PAS.

The reverse C- $\mu$ PAS was constructed by exchanging the cathode and the anode. The tungsten electrode as the anode and the capillary liquid electrode as the cathode. Therefore, anions could be separated and detected in the microplasma by the C- $\mu$ PAS.

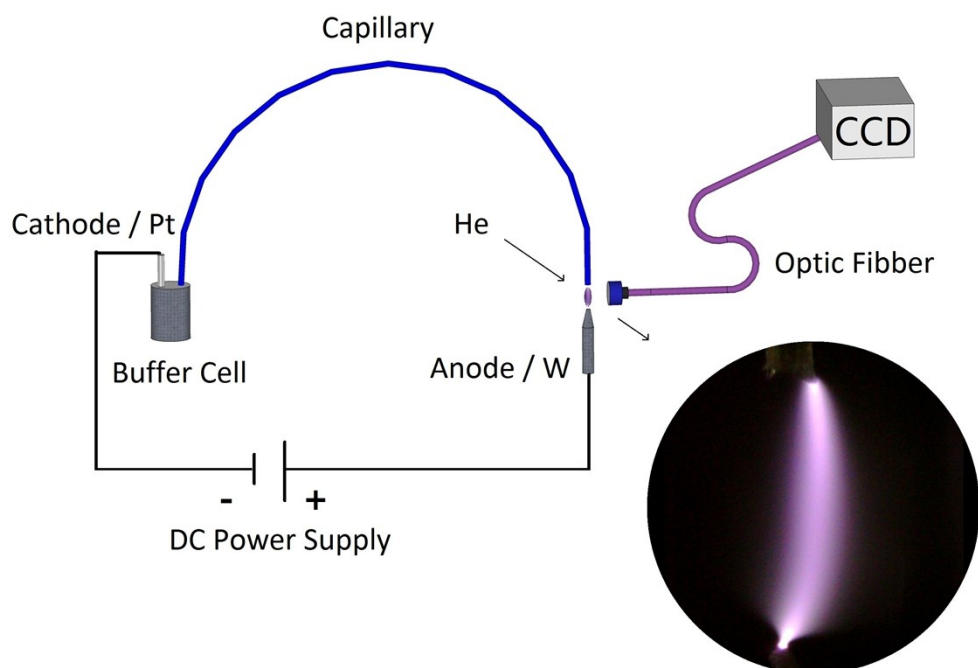

**Fig. S1** A schematic of the reverse C- $\mu$ PAS. The insert is the photo of the bright microplasma.

## 2. Operation conditions of HPLC-ICP-MS.

**Table S1.** The operation parameters of HPLC-ICP-MS

| <b>Parameters</b>                     | <b>values</b>                               |
|---------------------------------------|---------------------------------------------|
| HPLC                                  | Thermo U3000                                |
| Column                                | Thermo Synchronis Silica (150<br>×4.6×5 μm) |
| Mobile phase                          | Methanol                                    |
| Flow rate of the mobile phase (L/min) | 0.001                                       |
| Injection volume (μL)                 | 20                                          |
| ICP-MS                                | Thermo iCAPQ                                |
| RF(W)                                 | 1550                                        |
| Flow rate of nebulizer gas (L/min)    | 1.0                                         |
| Flow rate of auxiliary gas (L/min)    | 0.5                                         |
| Flow rate of plasma gas (L/min)       | 13                                          |
| Quantification                        | Peak area                                   |

### 3. Relationship between current and voltage of C- $\mu$ PAS and reverse C- $\mu$ PAS.

**Table S2.** The relationship of the current and the voltage of the proposed setup.

|                           | Voltage / kV | Current / mA |
|---------------------------|--------------|--------------|
| C- $\mu$ PAS (Ar)         | 1.0          | 0.01         |
|                           | 2.0          | 0.03         |
|                           | 3.0          | 0.07         |
|                           | 4.0          | 0.10         |
|                           | 5.0          | 0.16         |
|                           | 6.0          | 0.22         |
|                           | 7.0          | 0.27         |
| Reverse C- $\mu$ PAS (He) | 1.0          | 0.01         |
|                           | 2.0          | 0.04         |
|                           | 3.0          | 0.07         |
|                           | 4.0          | 0.09         |
|                           | 5.0          | 0.13         |
|                           | 6.0          | 0.21         |
|                           | 7.0          | 0.25         |

#### 4. Optimization of voltage of C- $\mu$ PAS for separation.

In this work, the voltages from 2.0 kV to 4.0 kV were tested for mercury detection to investigate the effect of voltage on the separation of C- $\mu$ PAS. A lower voltage took longer time to observe the appearance of the signal, because the current was lower and the migration rate of mobile ions.

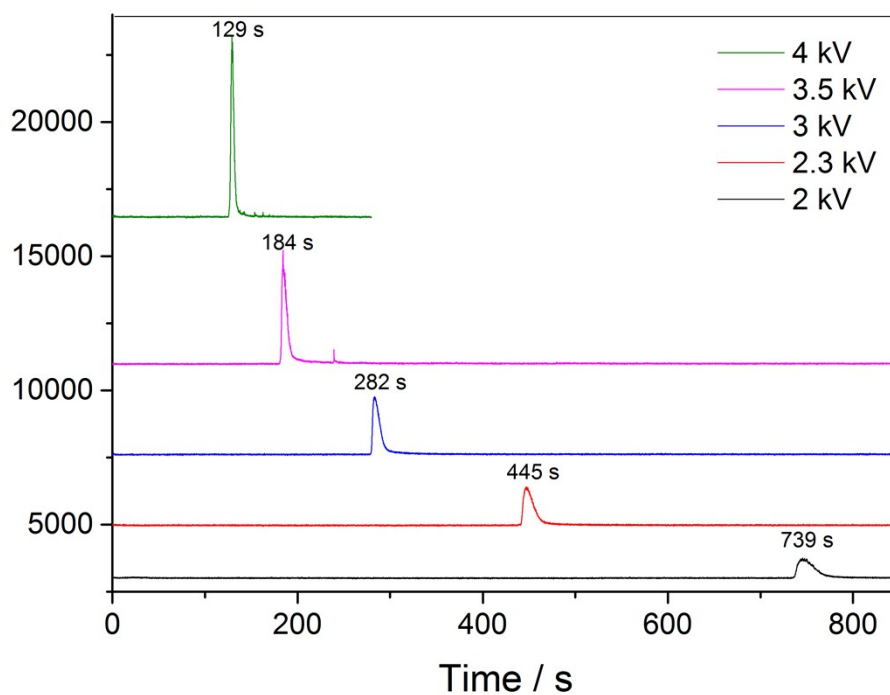

**Fig. S2** The effect of voltage on the separation of C- $\mu$ PAS. Working conditions: sample: 100  $\mu$ g/L  $\text{Hg}^{2+}$ ; working voltage: 2.0 kV-4.0 kV; current: 30  $\mu$ A-100  $\mu$ A; discharge area: 3.0 $\times$ 1.0  $\text{mm}^2$ ; and the flow rate of Ar: 200 mL/min.

## 5. Optimization of injection time of C- $\mu$ PAS for separation.

With the gravity injection method, it seemed no obvious difference between the injection time from 0.1 s to 10 s in the retention time.

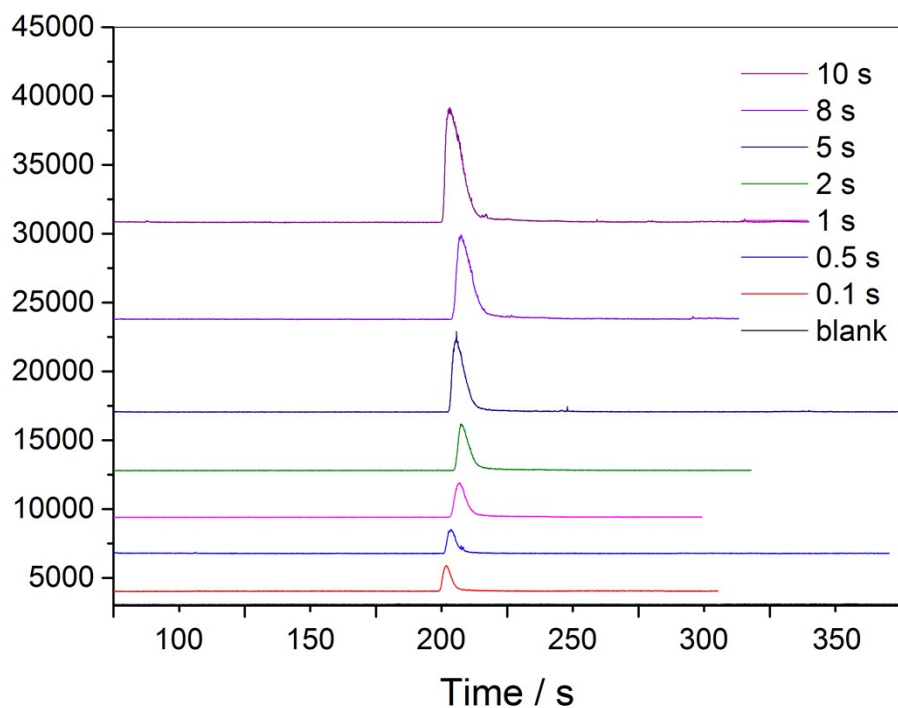

**Fig. S3** The effect of the injection time on the separation of C- $\mu$ PAS.

Working conditions: sample: 100  $\mu\text{g/L}$   $\text{Hg}^{2+}$ ; working voltage: 3.0 kV; current: 70  $\mu\text{A}$ ; discharge area:  $3.0 \times 1.0$   $\text{mm}^2$ ; and the flow rate of Ar: 200 mL/min.

## 6. Atomic emission spectra for several elements in C- $\mu$ PAS.

Compared with a blank, Hg atomic emission line (253.7 nm), Cd atomic emission lines (228.8 nm), Ca atomic emission line (458.6 nm), Cr atomic emission line (267.7 nm) and Na atomic emission line (589.0 nm) were clearly identified in the optical emission spectrum.

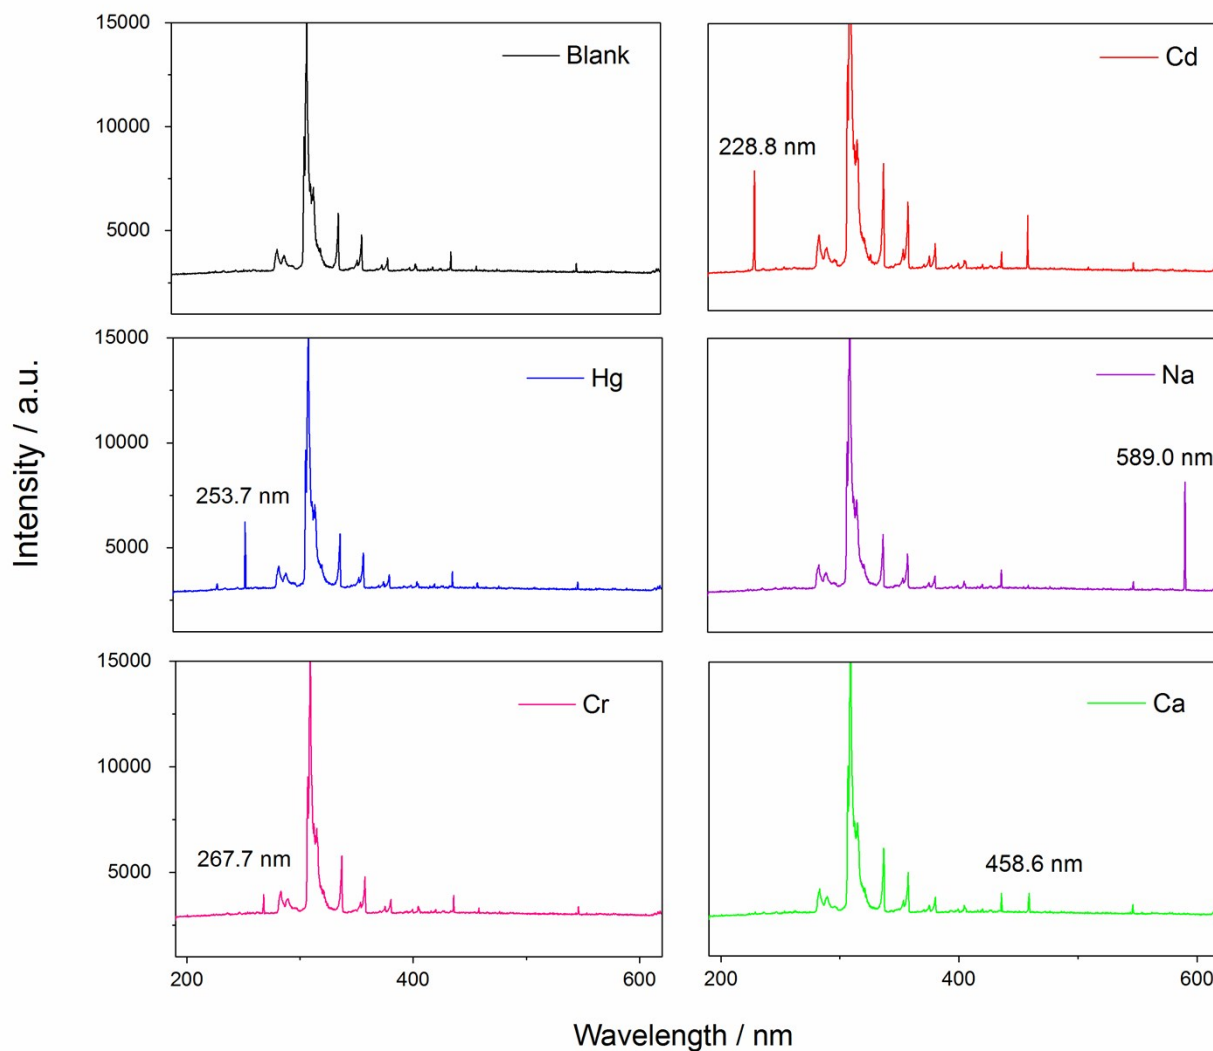

**Fig. S4** Optical emission spectrum of Hg atomic emission line (253.7 nm), Cd (228.8 nm), Ca (458.6 nm), Cr (267.7 nm) and Na (589.0 nm) in the C- $\mu$ PAS. Working conditions: sample: 100  $\mu$ g/L analytes; working voltage: 3.0 kV; current: 70  $\mu$ A; discharge area: 3.0 $\times$ 1.0 mm<sup>2</sup>; injection time: 5 s; and the flow rate of Ar: 200 mL/min.



## 7. Calculation of electron temperature and electron density of microplasma.

The OH rotational temperatures were calculated based on the rotational fine structure of the ( $A^2\Sigma^+ \rightarrow X^2\Pi_i$ ) OH band at 306.4 nm, 308.6 nm and 311.8 nm by means of a Boltzmann plot.

$$\frac{n_n}{n_m} = \frac{g_n}{g_m} \exp\left[-\frac{E_n - E_m}{kT}\right]$$

Firstly, the number of the electrons obeys the relationship with their energy level  $E_n$  and  $E_m$ , and the  $E_n - E_m$  is related to the spectral frequency. By using Log function on both sides, the equation can be rewritten as:

$$\ln\left(\frac{n_n}{g_n}\right) = -\frac{1}{kT} E_n + D$$

Where D is a constant. By using the method linear regression, the electron temperature of the microplasma was obtained (Fig. 5a).

In addition, combined with the temperature, it is not hard to figure out the Stark broadening of the spectrum.

$$\Delta\lambda_{\text{Stark}} = 2 \times \left[ 1 + 1.75 \times 10^{-4} \times \sqrt[4]{N_e} \alpha \times \left( 1 - 0.068 \sqrt[5]{N_e} \frac{1}{\sqrt{T_e}} \right) \right] \times 10^{-16} \omega N_e$$

Where  $\alpha$  is the static ion-broadening parameter,  $\omega$  is electron impact half-width.

$\Delta\lambda_{\text{Stark}}$  is a function of  $T_e$  and  $N_e$  (the electron density),  $\alpha$  and  $\omega$  are both function of  $T_e$ .

After the  $\Delta\lambda_{\text{Stark}}$  measured, the electron density of the microplasma was obtained.

## 8. Background emission from discharge gas in C- $\mu$ PAS.

In this work, three different gases, including Air, Ar and He, were tested as the discharge gas to investigate the background emission of the carrier gas on the spectral response.

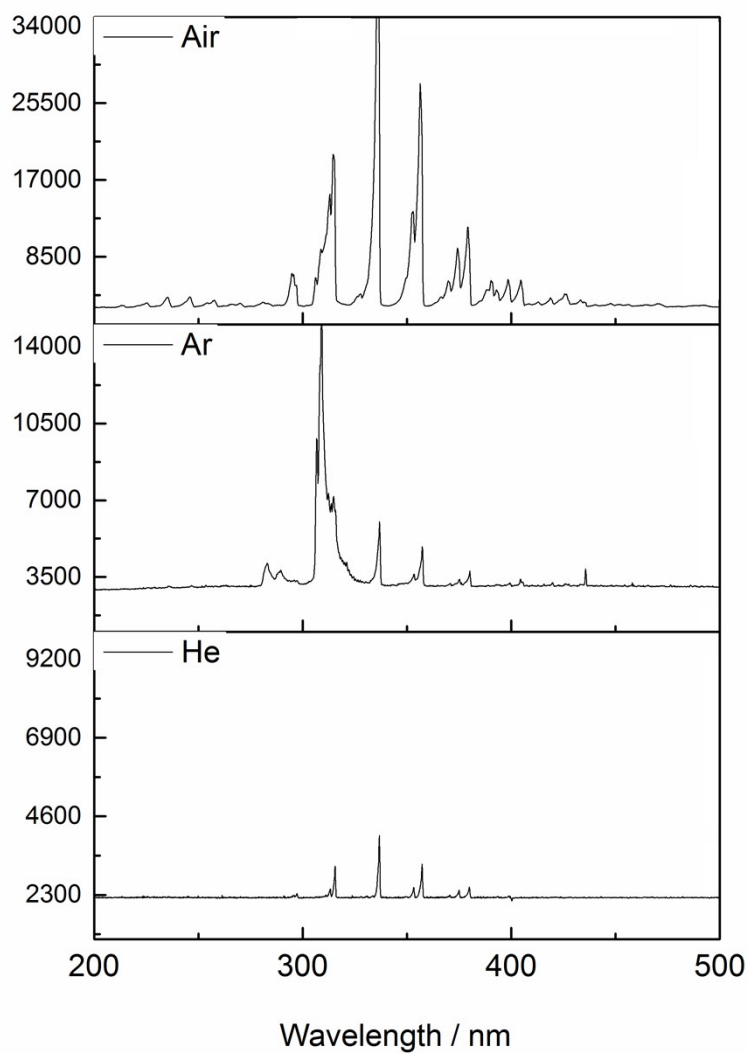

**Fig. S5** The effect of the discharge gas type on the background emission spectra.

Working conditions: working voltage: 3.0 kV; current: 70  $\mu$ A; discharge area: 3.0 $\times$ 1.0 mm<sup>2</sup>; and the flow rate of Ar/Air/He: 200 mL/min.

## 9. Effect of Ar flow rate on mercury atomic emission.

The spectral responses of mercury atomic emission significantly changed with the flow rate of Ar throughout the range of 50 - 600 mL/min in the C- $\mu$ PAS.

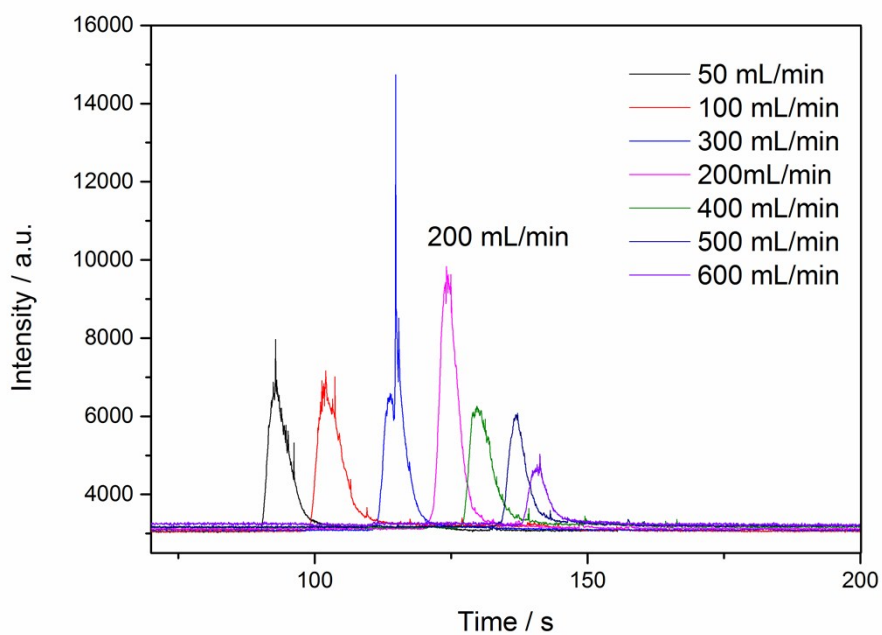

**Fig. S6** Effect of flow rate of discharge gas on the mercury atomic emission signal. Working conditions: working voltage: 3.0 kV; current: 70  $\mu$ A; discharge area: 3.0 $\times$ 1.0 mm<sup>2</sup>; and Hg<sup>2+</sup> concentration: 100  $\mu$ g/L.

## 10. Influence of analyte concentration.

In the initial experiments,  $0.1 \mu\text{g/mL}$  and  $10 \mu\text{g/mL}$  of Hg atomic emission spectra were tested. High concentration led to problematic tailing.

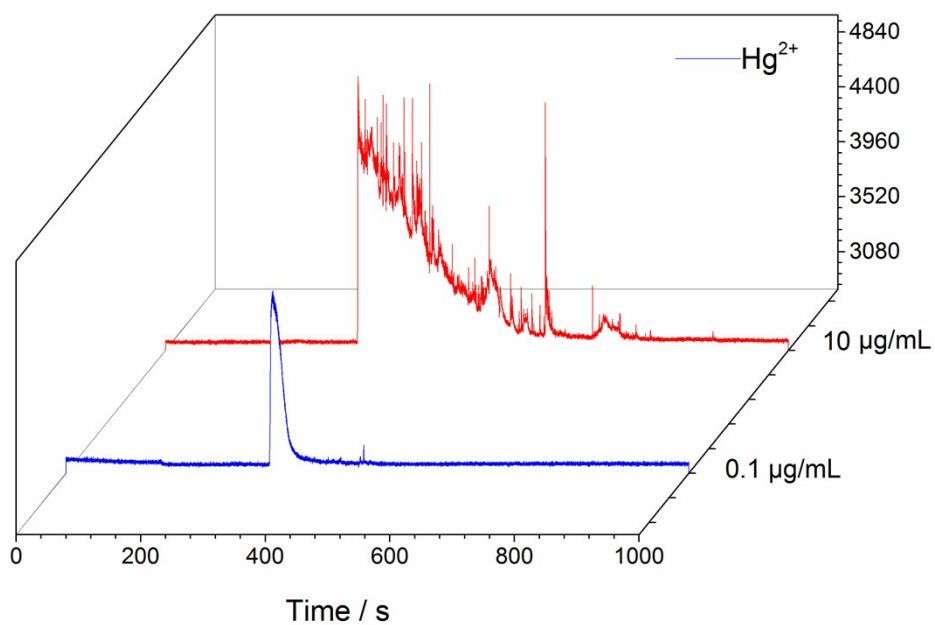

**Fig. S7** Effect of mercury concentration on the atomic emission spectra. Working conditions: working voltage: 3.0 kV; current:  $70 \mu\text{A}$ ; discharge area:  $3.0 \times 1.0 \text{ mm}^2$ ; and the flow rate of Ar:  $200 \text{ mL/min}$ .

## 11. Comparison of LODs for metals by this method with those reported in references.

**Table S3.** Comparison of the LODs by this method with those reported in references

| Method     | RSD (%) | LOD ( $\mu\text{g/L}$ )   | Derivatization | Operation | Interface | Reference |
|------------|---------|---------------------------|----------------|-----------|-----------|-----------|
| CE-UV      | <10     | 13-509                    | Yes            | Easy      | No        | [1]       |
| CE-CD      | <5      | 5-30 nmol/L               | Yes            | Easy      | No        | [2]       |
| CE-EC      | <5      | 5-40 nmol/L               | No             | Complex   | No        | [3]       |
| CE-FL      | <8      | 0.1-0.3 $\mu\text{mol/L}$ | Yes            | Easy      | Yes       | [4]       |
| CE-ICP-OES | <3      | 0.3-6                     | No             | Easy      | Yes       | [5]       |
| CE-MIP-OES | <7      | 3.9-5.4                   | Yes            | Complex   | Yes       | [6]       |
| CE-ICP-MS  | <5;     | 0.021-0.032               | Yes            | Complex   | Yes       | [7]       |
|            | <6      | 0.9 -3.0                  | No             |           |           | [8]       |
| $\mu$ -PAS | <5      | 2-40                      | No             | Easy      | No        | This work |

## 12. Photo of C- $\mu$ PAS.

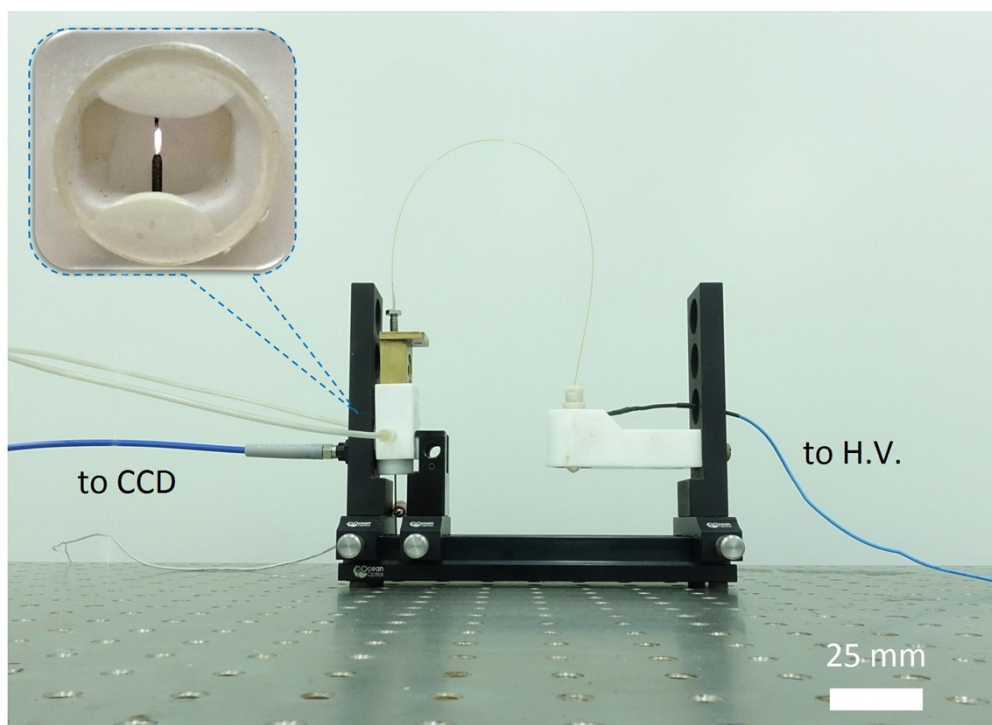

**Fig. S8** The photo of our C- $\mu$ PAS.

### Reference:

- [1] C. Casiot, M. Carmen Barciela Alonso, O. F. X. Donard, M. Potin-Gautier, M. Carmen Barciela Alonso, J. Boisson, *Analyst*, 1998, **123**, 2887.
- [2] F. Tan, B. Yang, Y. Guan, *Analytical Sciences*, 2005, **21**, 955.
- [3] J. Wen, A. Baranski, R. Cassidy, *Analytical Chemistry*, 1998, **70**, 2504.
- [4] R. Zhu, W.T. Kok, *Analytica Chimica Acta*, 1998, **371**, 269.
- [5] J.W. Olesik, J.A. Kinzer, S.V. Olesik, *Analytical Chemistry*, 1995, **67**, 1.
- [6] H. Matusiewicz, M. Ślachciński, *Microchemical Journal*, 2012, **102**, 61.
- [7] Y. Zhao, J. Zheng, L. Fang, Q. Lin, Y. Wu, Z. Xue, F. Fu, *Talanta*, 2012, **89**, 280.
- [8] L. Liu, B. He, Z. Yun, J. Sun, G. Jiang, *Journal of Chromatography A*, 2013, **227**, 1304.
